# Supplementary material for: Methanogenic degradation of lignin-derived monoaromatic compounds by microbial enrichments from rice paddy field soil
Source: PubMed Central journal article supplement (PMC4585845; doi:10.1038/srep14295), 2015-09-24
Supplement: srep14295-s1.pdf [file srep14295-s1.pdf]

1 Methanogenic complete degradation of lignin-derived  
2 monoaromatic compounds by microbial enrichments from rice  
3 paddy field soil

4  
5 Souichiro Kato<sup>1,2,3\*</sup>, Kanako Chino<sup>4</sup>, Naofumi Kamimura<sup>4</sup>, Eiji Masai<sup>4</sup>, Isao Yumoto<sup>1</sup>  
6 and Yoichi Kamagata<sup>1,2</sup>

7  
8 <sup>1</sup>*Bioproduction Research Institute, National Institute of Advanced Industrial Science*  
9 *and Technology (AIST), 2-17-2-1 Tsukisamu-Higashi, Toyohira-ku, Sapporo, Hokkaido*  
10 *062-8517, Japan*

11 <sup>2</sup>*Division of Applied Bioscience, Graduate School of Agriculture, Hokkaido University,*  
12 *Kita-9 Nishi-9, Kita-ku, Sapporo, Hokkaido 060-8589, Japan*

13 <sup>3</sup>*Research Center for Advanced Science and Technology, The University of Tokyo,*  
14 *4-6-1 Komaba, Meguro-ku, Tokyo 153-8904, Japan*

15 <sup>4</sup>*Department of Bioengineering, Nagaoka University of Technology, 1603-1*  
16 *Kamitomioka, Nagaoka, Niigata 940-2188, Japan*

17  
18 \*For correspondence. E-mail s.katou@aist.go.jp; Tel (+81) 11 857 8968; Fax (+81) 11  
19 857 8915

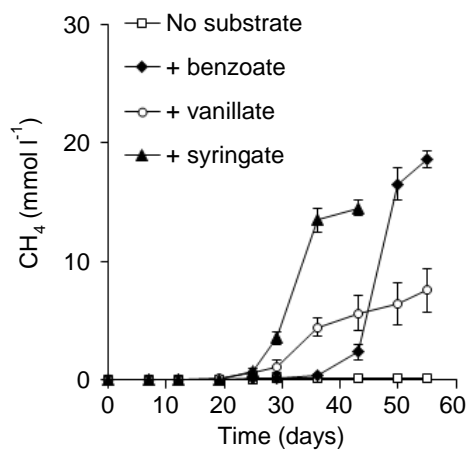

**Fig. S1.** Methane production by the first enrichment cultures. Production of CH<sub>4</sub> was monitored during the incubation of respective cultures inoculated with rice paddy field soil and supplemented with 5 mM of benzoate (closed diamonds), vanillate (open circles), or syringate (closed triangles). The data for no-amendment control (open squares) are also presented. Data are presented as the means of three independent cultures, and error bars represent standard deviations.

### A. benzoate

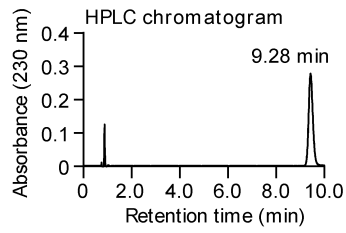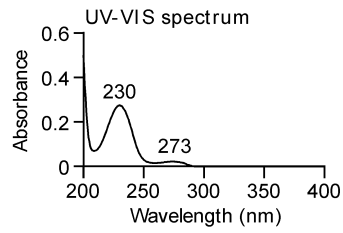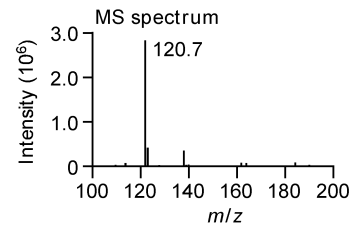

### B. vanillate

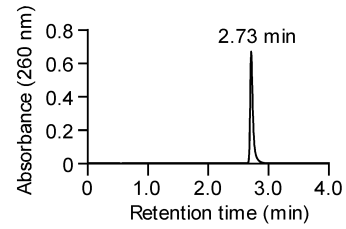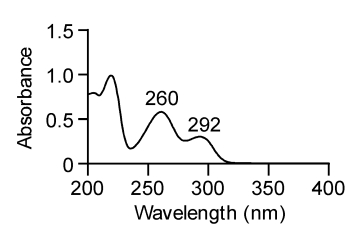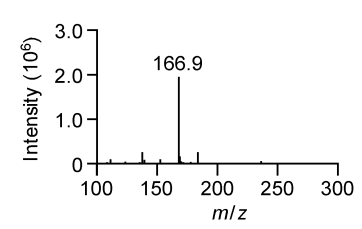

### C. protocatechuate

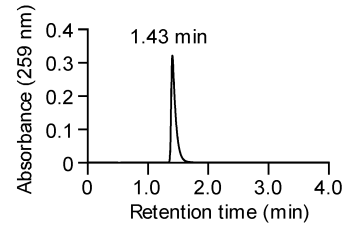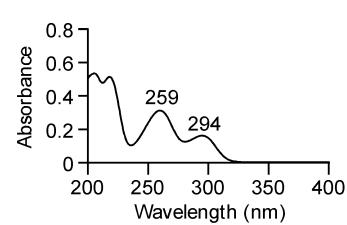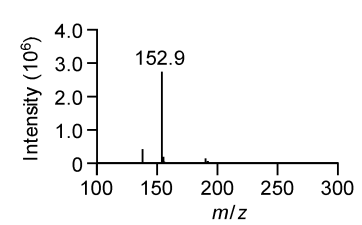

### D. catechol

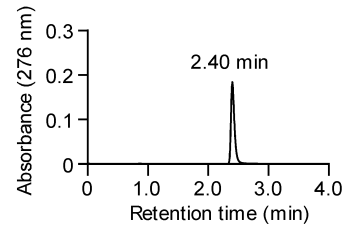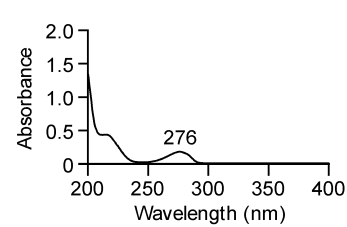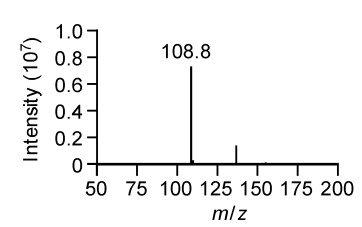

### E. 3-hydroxybenzoate

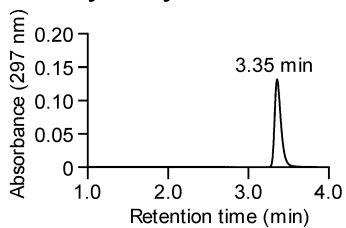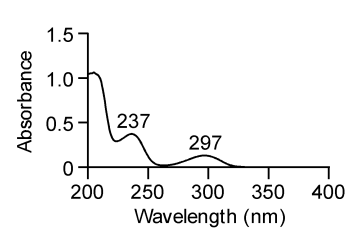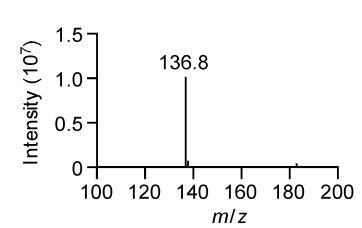

### F. 4-hydroxybenzoate

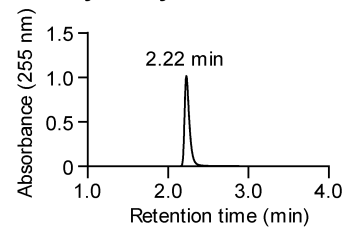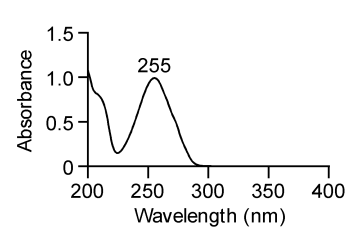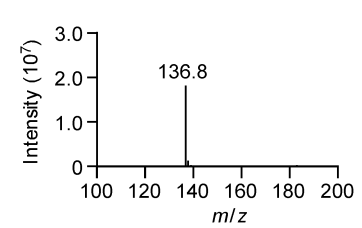

### G syringate

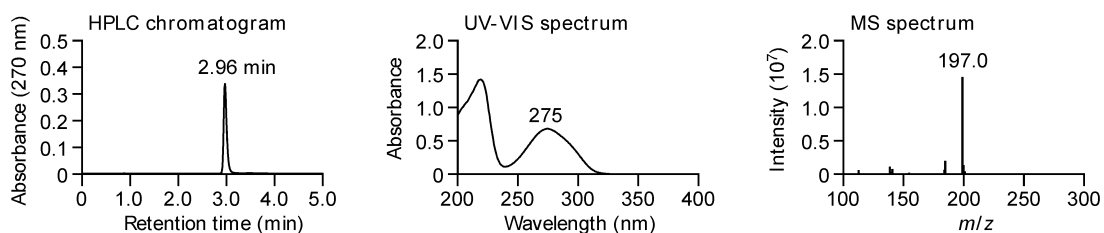

### H. 3-O-methyl gallate

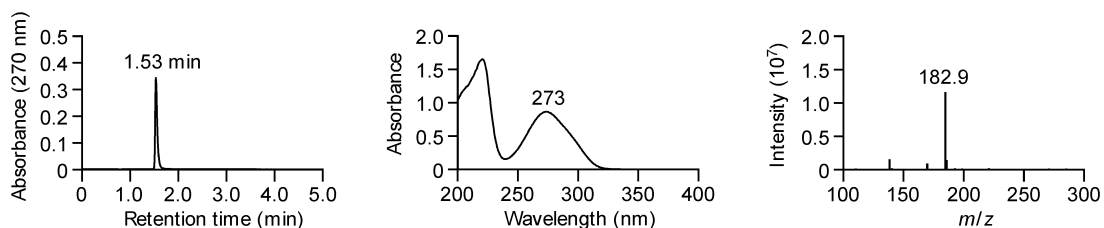

### I. gallate

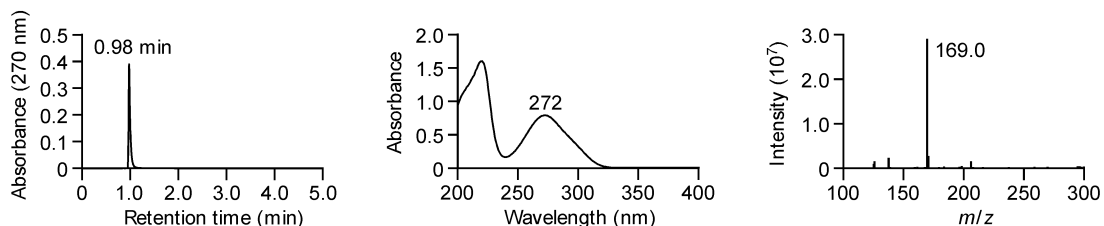

**Fig. S2.** LC-MS analysis of authentic benzoate (A), vanillate (B), protocatechuate (C), catechol (D), 3-hydroxybenzoate (E), 4-hydroxybenzoate (F), syringate (G), 3-*O*-methyl gallate (H), and gallate (I). HPLC chromatogram (left), UV-VIS spectra (center), and negative-ion ESI-MS spectra (right) are shown. In the HPLC analysis, compounds were detected at the following wavelength: benzoate, 230 nm; vanillate, 260 nm; PCA, 259 nm; catechol, 276 nm; 3-hydroxybenzoate, 297 nm; 4-hydroxybenzoate, 255 nm; and syringate, 3-MGA, and gallate, 270 nm. The retention times of benzoate, vanillate, PCA, catechol, 3-hydroxybenzoate, 4-hydroxybenzoate, syringate, 3-*O*-methyl gallate, and gallate were 9.28, 2.73, 1.43, 2.40, 3.35, 2.22, 2.96, 1.53, and 0.98 min, respectively.

### A. compound 1

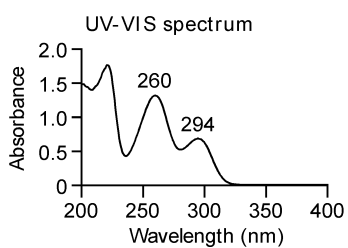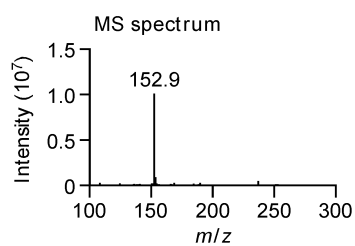

### B. compound 2

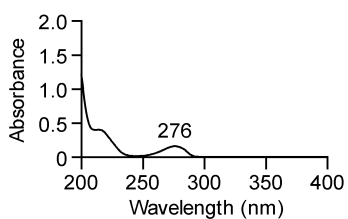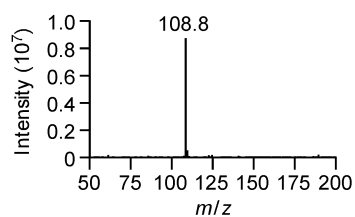

### C. compound 3

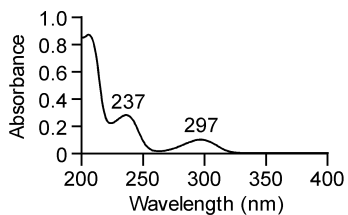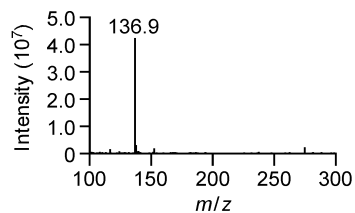

### D. compound 4

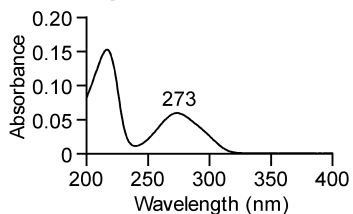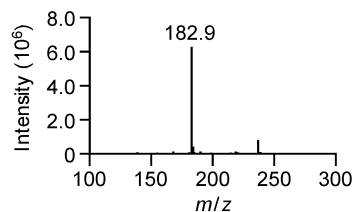

### E. compound 5

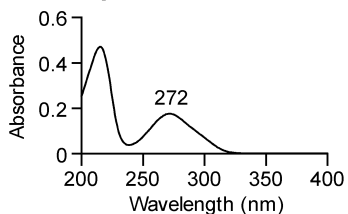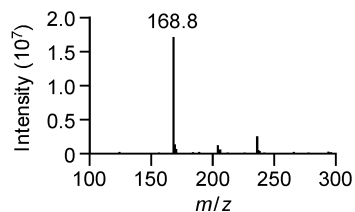

**Fig. S3.** UV/VIS and mass spectrum of compound I to V produced in the enrichment of vanillate and syringate. UV/VIS spectrum (left) and negative-ion ESI-MS spectrum (right) are shown.

**Table S1.** The archaeal phylotypes detected from the aromatics-degrading enrichment cultures.

| Phylogenetic group<br>(Family)               | Phylotype | Closest relative (identity, %)                                                                 | Number of clones <sup>a</sup> |    |     |     |    |    |
|----------------------------------------------|-----------|------------------------------------------------------------------------------------------------|-------------------------------|----|-----|-----|----|----|
|                                              |           |                                                                                                | BA                            | VA | PCA | Cat | SA | GA |
| <i>Methanosarcinaceae</i>                    | ArA-01    | NR_104728 <i>Methanosarcina vacuolata</i> Z-761 (98.9)                                         | 6                             | 13 | 18  | 17  | 18 | 24 |
| <i>Methanomicrobiaceae</i>                   | ArA-02    | NR_028253 <i>Methanoculleus palmolei</i> DSM 4273 (97.9)                                       | 3                             | 8  | 5   | 6   | 11 | 3  |
| <i>Methanocellaceae</i>                      | ArA-03    | AM114193 <i>Methanocella arvoryzae</i> MRE50 (97.5)                                            | 14                            | 3  |     |     |    | 3  |
| <i>Thermoplasmatales_in<br/>certae_sedis</i> | ArA-04    | CP005934 <i>Candidatus</i> “ <i>Methanomassiliicoccus intestinalis</i> ”<br>Issoire-Mx1 (96.8) | 1                             |    |     |     |    |    |
| Total                                        |           |                                                                                                | 24                            | 24 | 23  | 23  | 29 | 30 |

<sup>a</sup> BA; benzoate, VA; vanillate, PCA; protocatechuate, Cat; catechol, SA; syringate, GA; gallate

**Table S2.** The bacterial phylotypes detected from the aromatics-degrading enrichment cultures.

| Phylogenetic group |                              | Phylo-<br>type | Closest relative (identity, %)                                              | Number of clones <sup>a</sup> |    |     |     |    |    |    |
|--------------------|------------------------------|----------------|-----------------------------------------------------------------------------|-------------------------------|----|-----|-----|----|----|----|
| Phylum             | Family                       |                |                                                                             | BA                            | VA | PCA | Cat | SA | GA |    |
| <i>Firmicutes</i>  | <i>Veillonellaceae</i>       | ArB-01         | NR_117663 <i>Sporomusa sphaeroides</i> DSM2875 (99.6)                       |                               | 8  |     |     | 22 |    |    |
|                    |                              | ArB-02         | NR_104801 <i>Sporomusa paucivorans</i> DSM3697 (89.8)                       |                               |    |     |     | 5  |    |    |
|                    |                              | ArB-03         | NR_114884 <i>Propionispora hippei</i> KS (94.1)                             |                               | 1  |     |     |    | 3  |    |
|                    | <i>Peptococcaceae</i>        | ArB-04         | NR_119207 <i>Pelotomaculum schinkii</i> HH (96.8)                           |                               |    |     |     | 22 |    |    |
|                    |                              | ArB-05         | NR_025551 <i>Desulfosporosinus auripigmenti</i> OREX-4 (97.9)               |                               | 10 |     |     | 12 |    |    |
|                    |                              | ArB-06         | NR_025757 <i>Cryptanaerobacter phenolicus</i> LR7.2 (98.4)                  |                               | 6  | 30  |     | 2  |    |    |
|                    |                              | ArB-07         | AJ229190 Unidentified eubacterium from anoxic bulk soil, clone BSV28 (97.2) |                               |    |     |     | 1  | 3  |    |
|                    | <i>Ruminococcaceae</i>       | ArB-08         | AB596889 <i>Acetivibrio</i> sp. 6-13 (92.0)                                 |                               |    |     |     |    | 4  | 22 |
|                    |                              | ArB-09         | JX101685 <i>Intestinimonas butyriciproducens</i> AP4 (97.1)                 |                               | 3  |     |     |    | 4  | 13 |
|                    |                              | ArB-10         | NR_044972 <i>Sporobacter termitidis</i> SYR (96.9)                          |                               |    |     |     | 4  |    |    |
|                    |                              | ArB-11         | AF550610 <i>Lachnospiraceae</i> bacterium 19gly4 (96.8)                     |                               |    |     |     | 2  | 2  |    |
|                    |                              | ArB-12         | DQ002932 <i>Anaerotruncus colihominis</i> HKU19 (94.1)                      |                               |    | 2   |     |    |    |    |
|                    |                              | ArB-13         | NR_025025 <i>Papillibacter cinnamivorans</i> CIN1 (89.5)                    |                               |    |     |     |    | 1  |    |
|                    | <i>Gracilibacteraceae</i>    | ArB-14         | NR_115692 <i>Gracilibacter thermotolerans</i> JW/YJL-S1 (97.7)              | 3                             | 2  |     |     |    | 1  |    |
|                    |                              | ArB-15         | NR_041236 <i>Lutispora thermophila</i> EBR46 (97.3)                         |                               | 1  |     |     |    | 2  |    |
|                    | Clostridiales_incertae_sedis | ArB-16         | NR_044093 <i>Proteiniborus ethanoliigenes</i> GW (94.7)                     |                               | 1  | 1   |     |    | 2  |    |
|                    |                              | ArB-17         | X76161 <i>Clostridium aminobutyricum</i> DSM2634 (95.7)                     | 1                             |    | 1   |     |    | 1  | 1  |
|                    |                              | ArB-18         | AY571338 <i>Sedimentibacter hongkongensis</i> KI (97.6)                     |                               | 2  |     |     |    |    |    |

**Table S2.** Continued.

| Phylogenetic group     |                            | Phylo-<br>type | Closest relative (identity, %)                               | Number of clones <sup>a</sup> |    |     |     |    |    |
|------------------------|----------------------------|----------------|--------------------------------------------------------------|-------------------------------|----|-----|-----|----|----|
| Phylum                 | Family                     |                |                                                              | BA                            | VA | PCA | Cat | SA | GA |
| <i>Firmicutes</i>      | <i>Clostridiaceae</i>      | ArB-19         | NR_112900 <i>Christensenella minuta</i> YIT12065 (90.7)      |                               | 1  |     |     | 2  |    |
|                        |                            | ArB-20         | NR_026322 <i>Clostridium pascui</i> DSM10365 (99.6)          |                               |    | 3   |     |    |    |
|                        |                            | ArB-21         | AB971811 <i>Clostridium sporogenes</i> JCM7849 (87.5)        |                               |    |     |     | 1  |    |
|                        |                            | ArB-22         | NR_113027 <i>Clostridium subterminale</i> JCM1417 (96.7)     |                               |    |     |     | 1  |    |
|                        | <i>Erysipelotrichaceae</i> | ArB-23         | NR_028816 <i>Turicibacter sanguinis</i> MOL361 (88.4)        |                               | 1  |     |     |    |    |
|                        | <i>Syntrophomonadaceae</i> | ArB-24         | NR_115800 <i>Syntrophomonas wolfei</i> 4J5 (95.1)            |                               | 1  |     |     |    |    |
| <i>Proteobacteria</i>  | <i>Syntrophaceae</i>       | ArB-25         | NR_102776 <i>Syntrophus aciditrophicus</i> SB (99.0)         | 33                            |    |     |     |    |    |
|                        | <i>Desulfovibrionaceae</i> | ArB-26         | AJ582758 <i>Desulfovibrio idahonensis</i> CY2 (99.6)         |                               |    |     |     | 4  |    |
|                        | <i>Campylobacteraceae</i>  | ArB-27         | CP007201 <i>Sulfurospirillum multivorans</i> DSM12446 (99.2) | 2                             |    |     |     |    |    |
| <i>Bacteroidetes</i>   | unclassified               | ArB-28         | AB623230 <i>Bacteroidetes</i> bacterium 4F6B (89.8)          | 3                             | 3  | 4   | 4   |    | 1  |
|                        | <i>Sunxiuqinia</i>         | ArB-29         | AB921558 <i>Bacteroidales</i> bacterium Fu11-5 (91.7)        |                               |    |     | 4   |    |    |
|                        | <i>Bacteroidaceae</i>      | ArB-30         | NR_125463 <i>Bacteroides luti</i> UasXn-3 (98.5)             | 2                             | 1  | 1   |     |    |    |
|                        | <i>Porphyromonadaceae</i>  | ArB-31         | AB910740 <i>Paludibacter propionicigenes</i> (97.7)          |                               | 1  |     |     |    |    |
| <i>Ignavibacteriae</i> | unclassified               | ArB-32         | NR_074698 <i>Ignavibacterium album</i> JCM16511 (85.0)       |                               | 1  |     |     |    |    |
| <i>Spirochaetes</i>    | <i>Spirochaetaceae</i>     | ArB-33         | AY695841 <i>Spirochaetes</i> bacterium SA-10 (93.2)          |                               |    |     |     | 1  |    |
| <i>Verrucomicrobia</i> | unclassified               | ArB-34         | AY960781 <i>Bacterium</i> Ellin518 (97.0)                    |                               |    |     |     | 1  |    |
| Total                  |                            |                |                                                              | 44                            | 45 | 40  | 60  | 48 | 40 |

<sup>a</sup> BA; benzoate, VA; vanillate, PCA; protocatechuate, Cat; catechol, SA; syringate, GA; gallate
